# Supplementary material for: Rab12 is a regulator of LRRK2 and its activation by damaged lysosomes
Source: eLife journal article supplement (doi:10.7554/elife.87255), 2023-10-24

Figure 1D

$\alpha$ -pT73  
Rab10

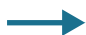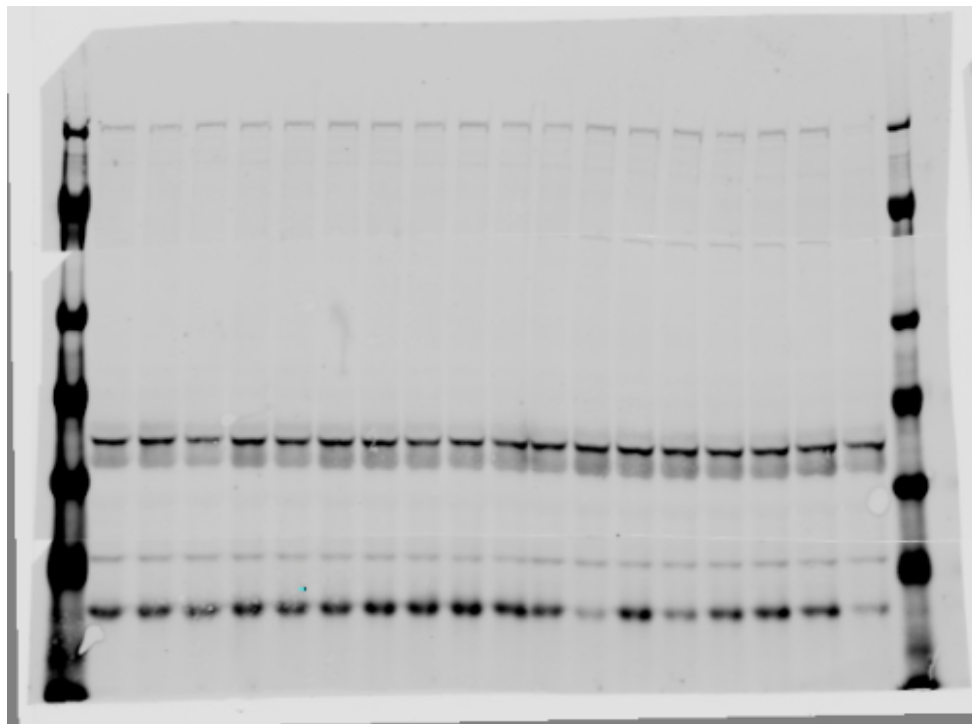

$\alpha$ -Rab10

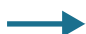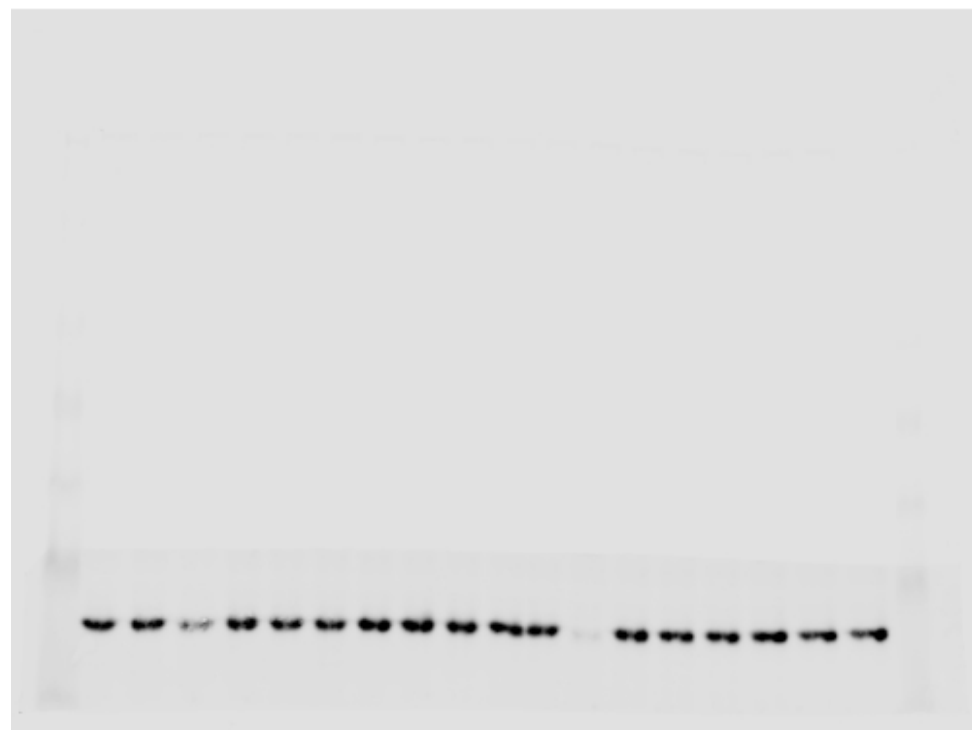

$\alpha$ -Rab12

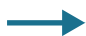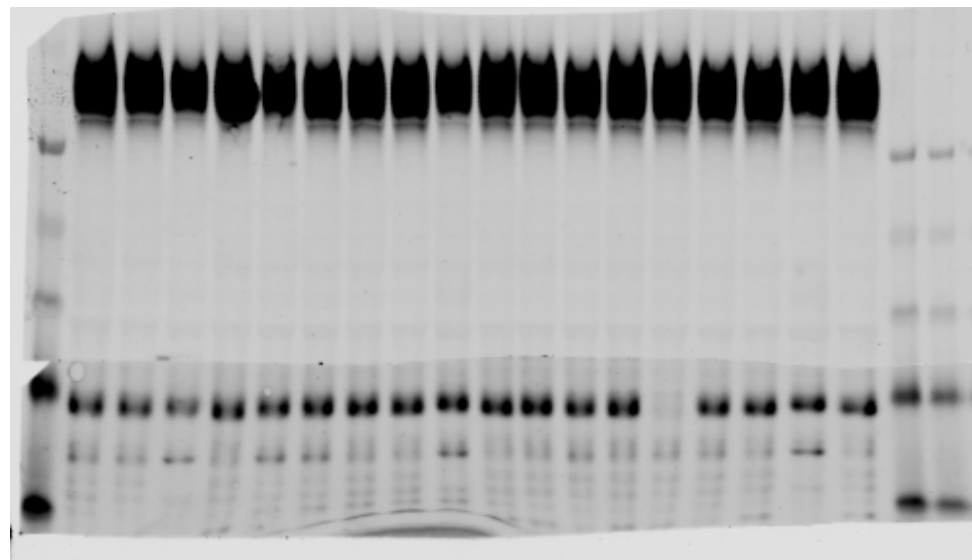

Figure 1D

$\alpha$ -LRRK2 →

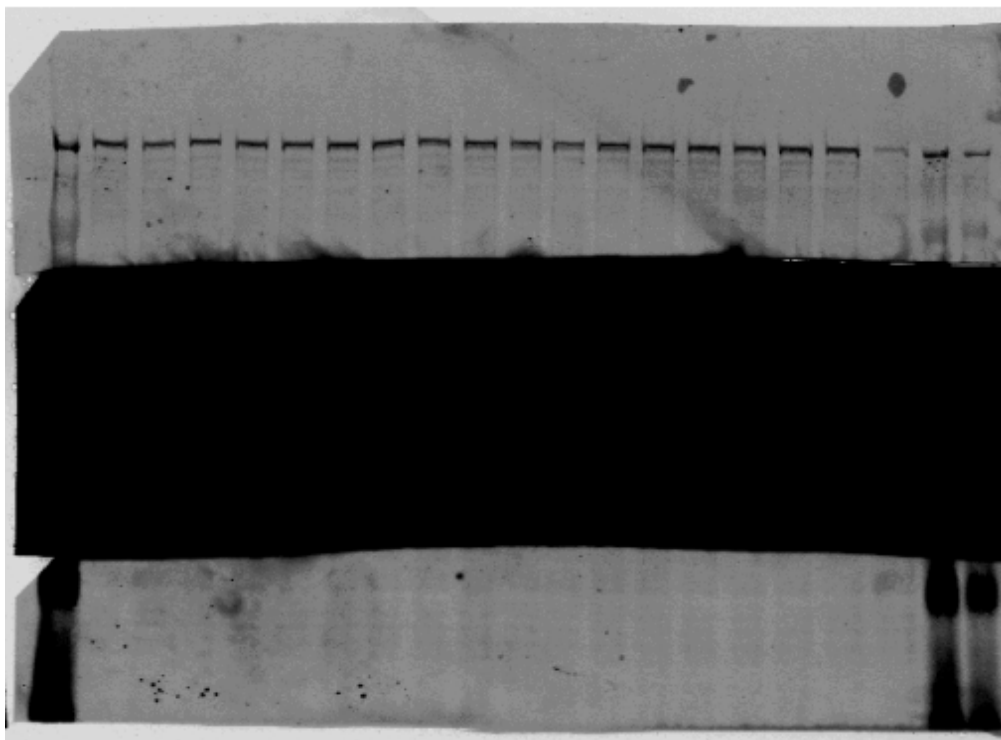

$\alpha$ -Rab8 →

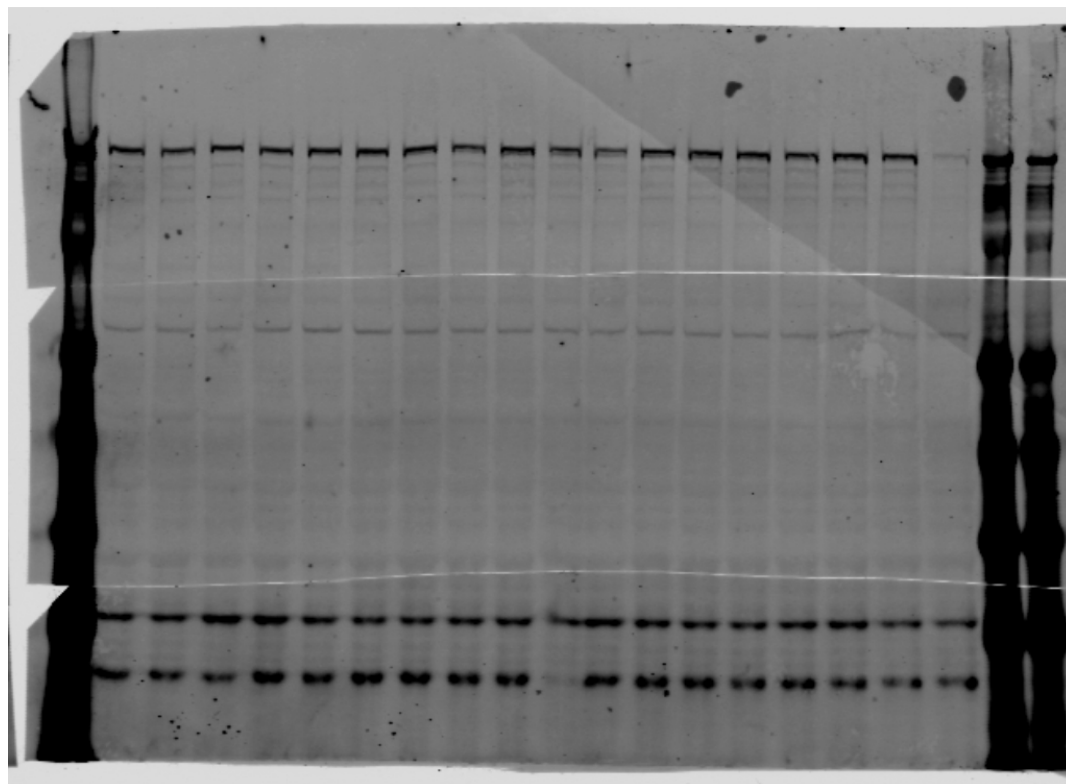

$\alpha$ -GAPDH →

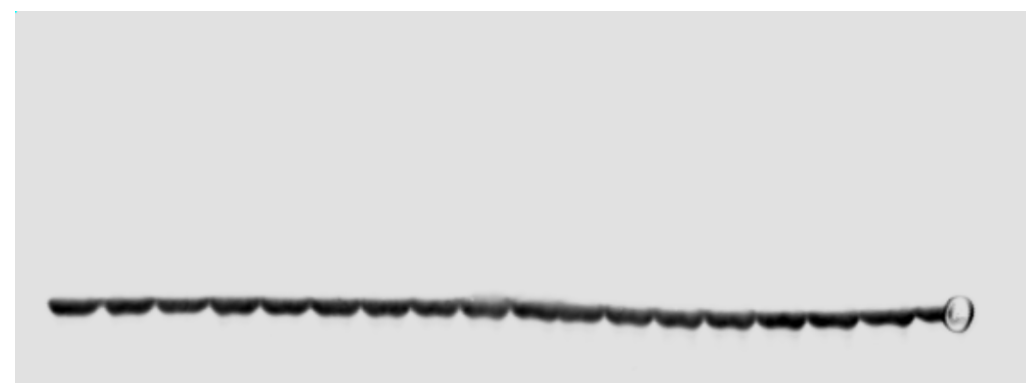

Figure 1E

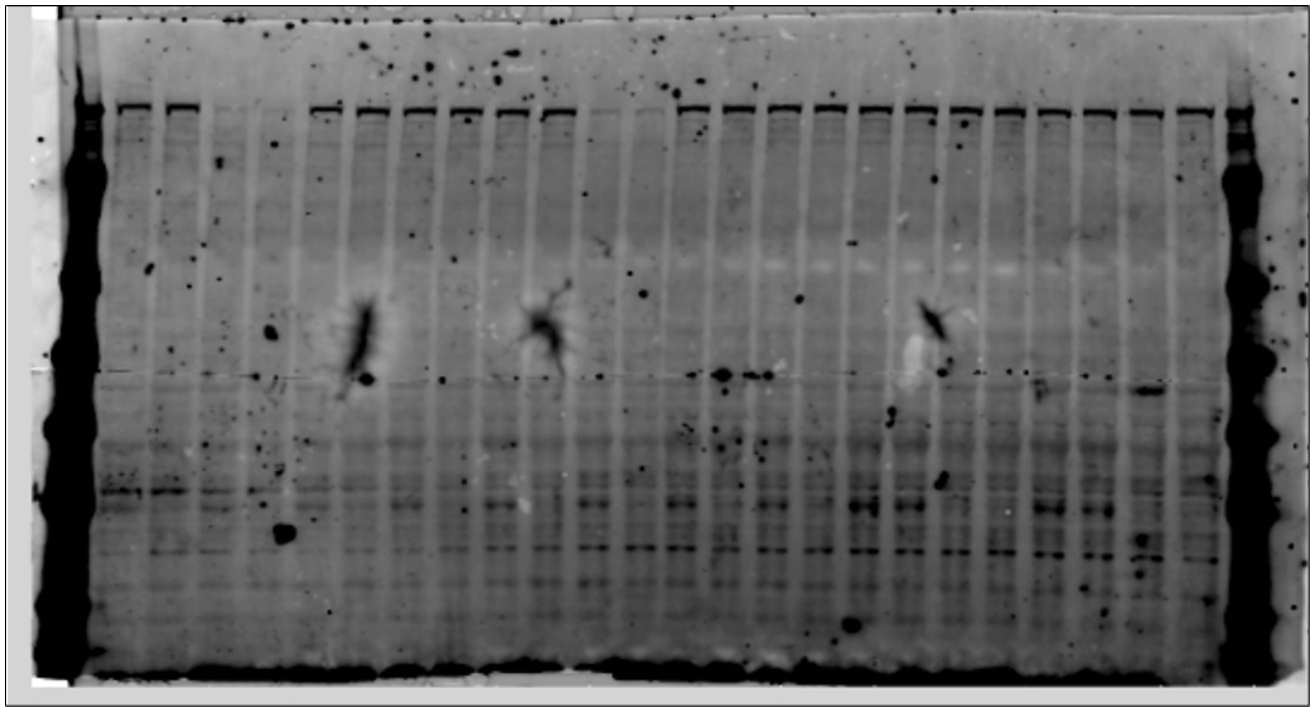

$\alpha$ -Rab12

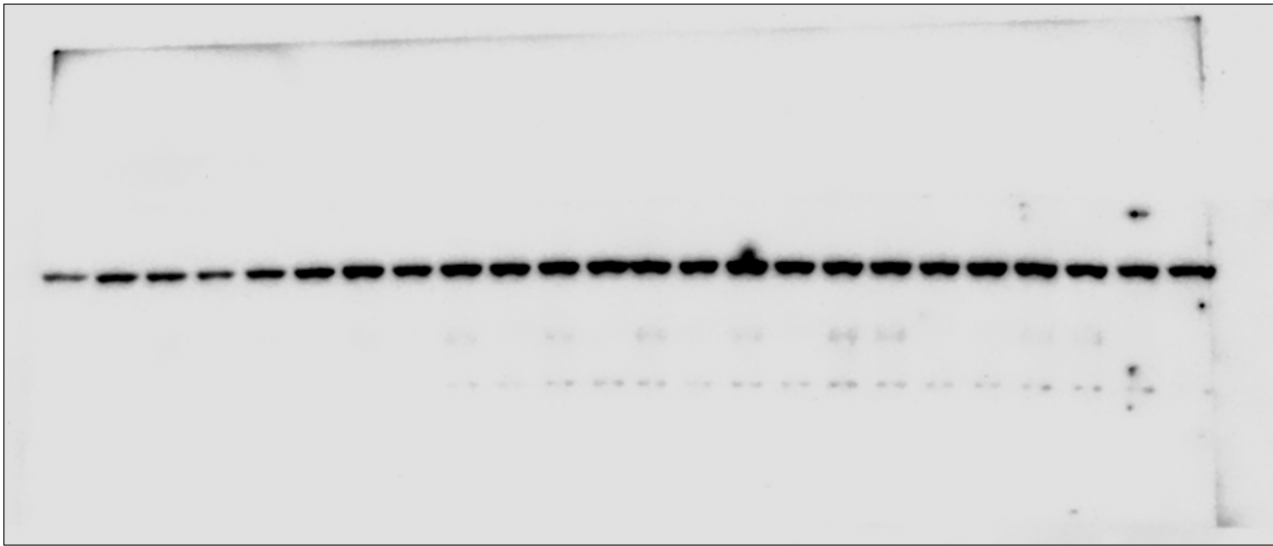

GAPDH

Figure 1F

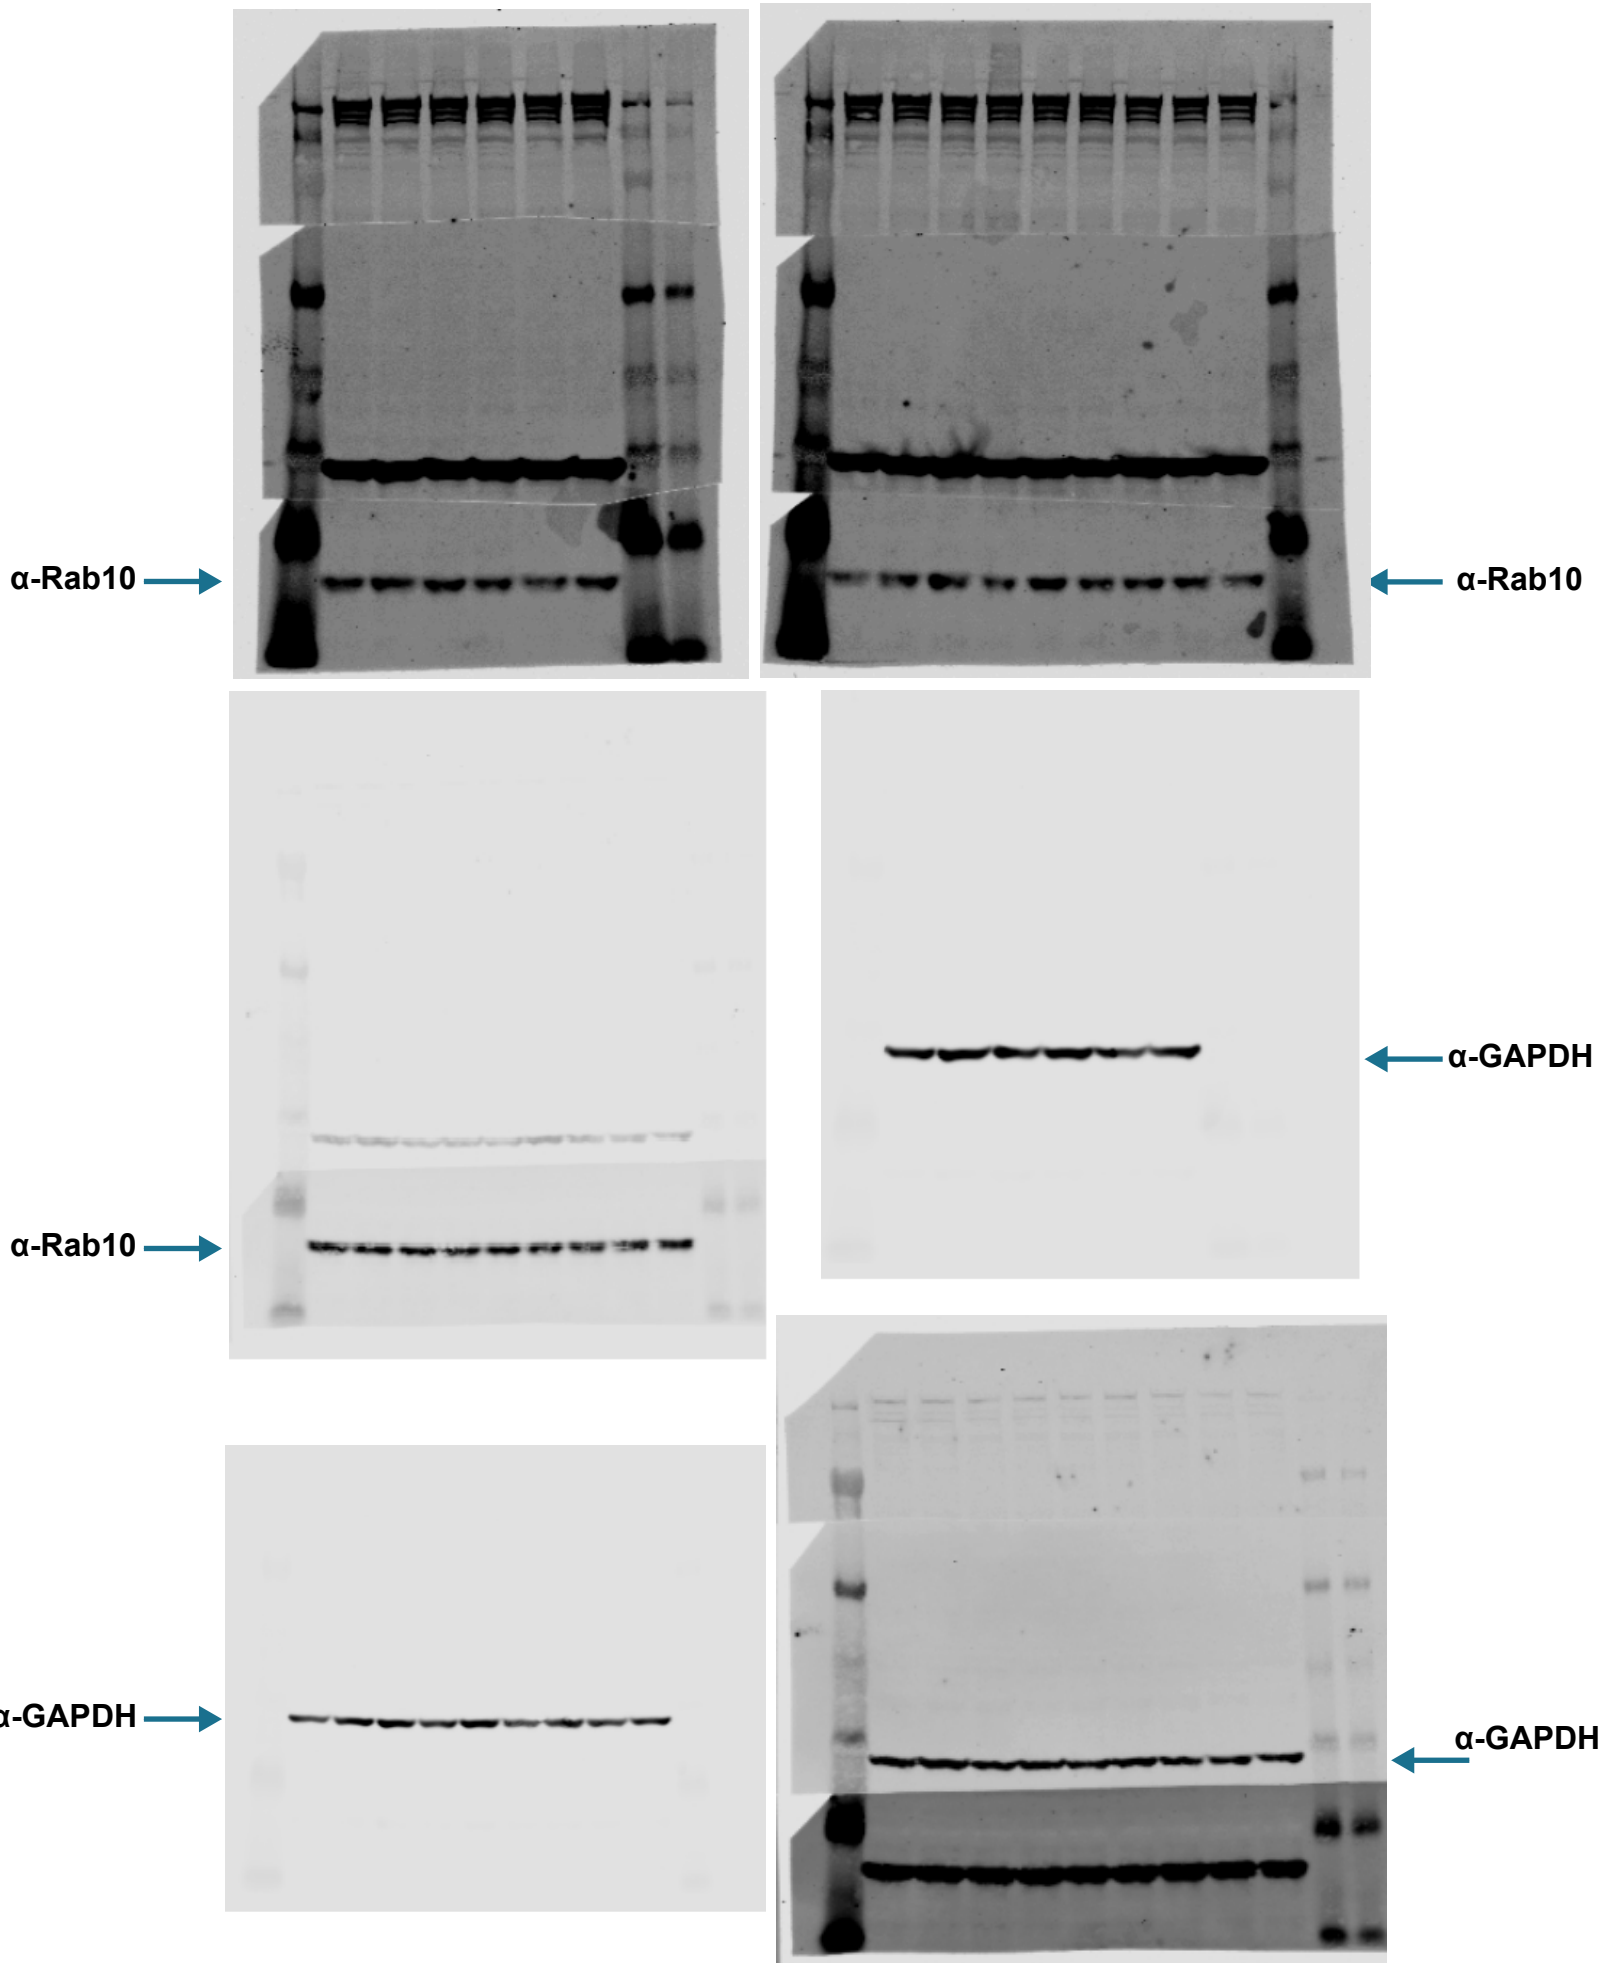

Supplement: fig1-data2 [file elife-87255-fig1-data2-v2.pdf]
