# Supplementary material for: Rab12 is a regulator of LRRK2 and its activation by damaged lysosomes
Source: eLife journal article supplement (doi:10.7554/elife.87255), 2023-10-24

# Figure 1- figure supplement 1

Representative Rab10 and GAPDH blots that were included in quantification shown in Figure 1F

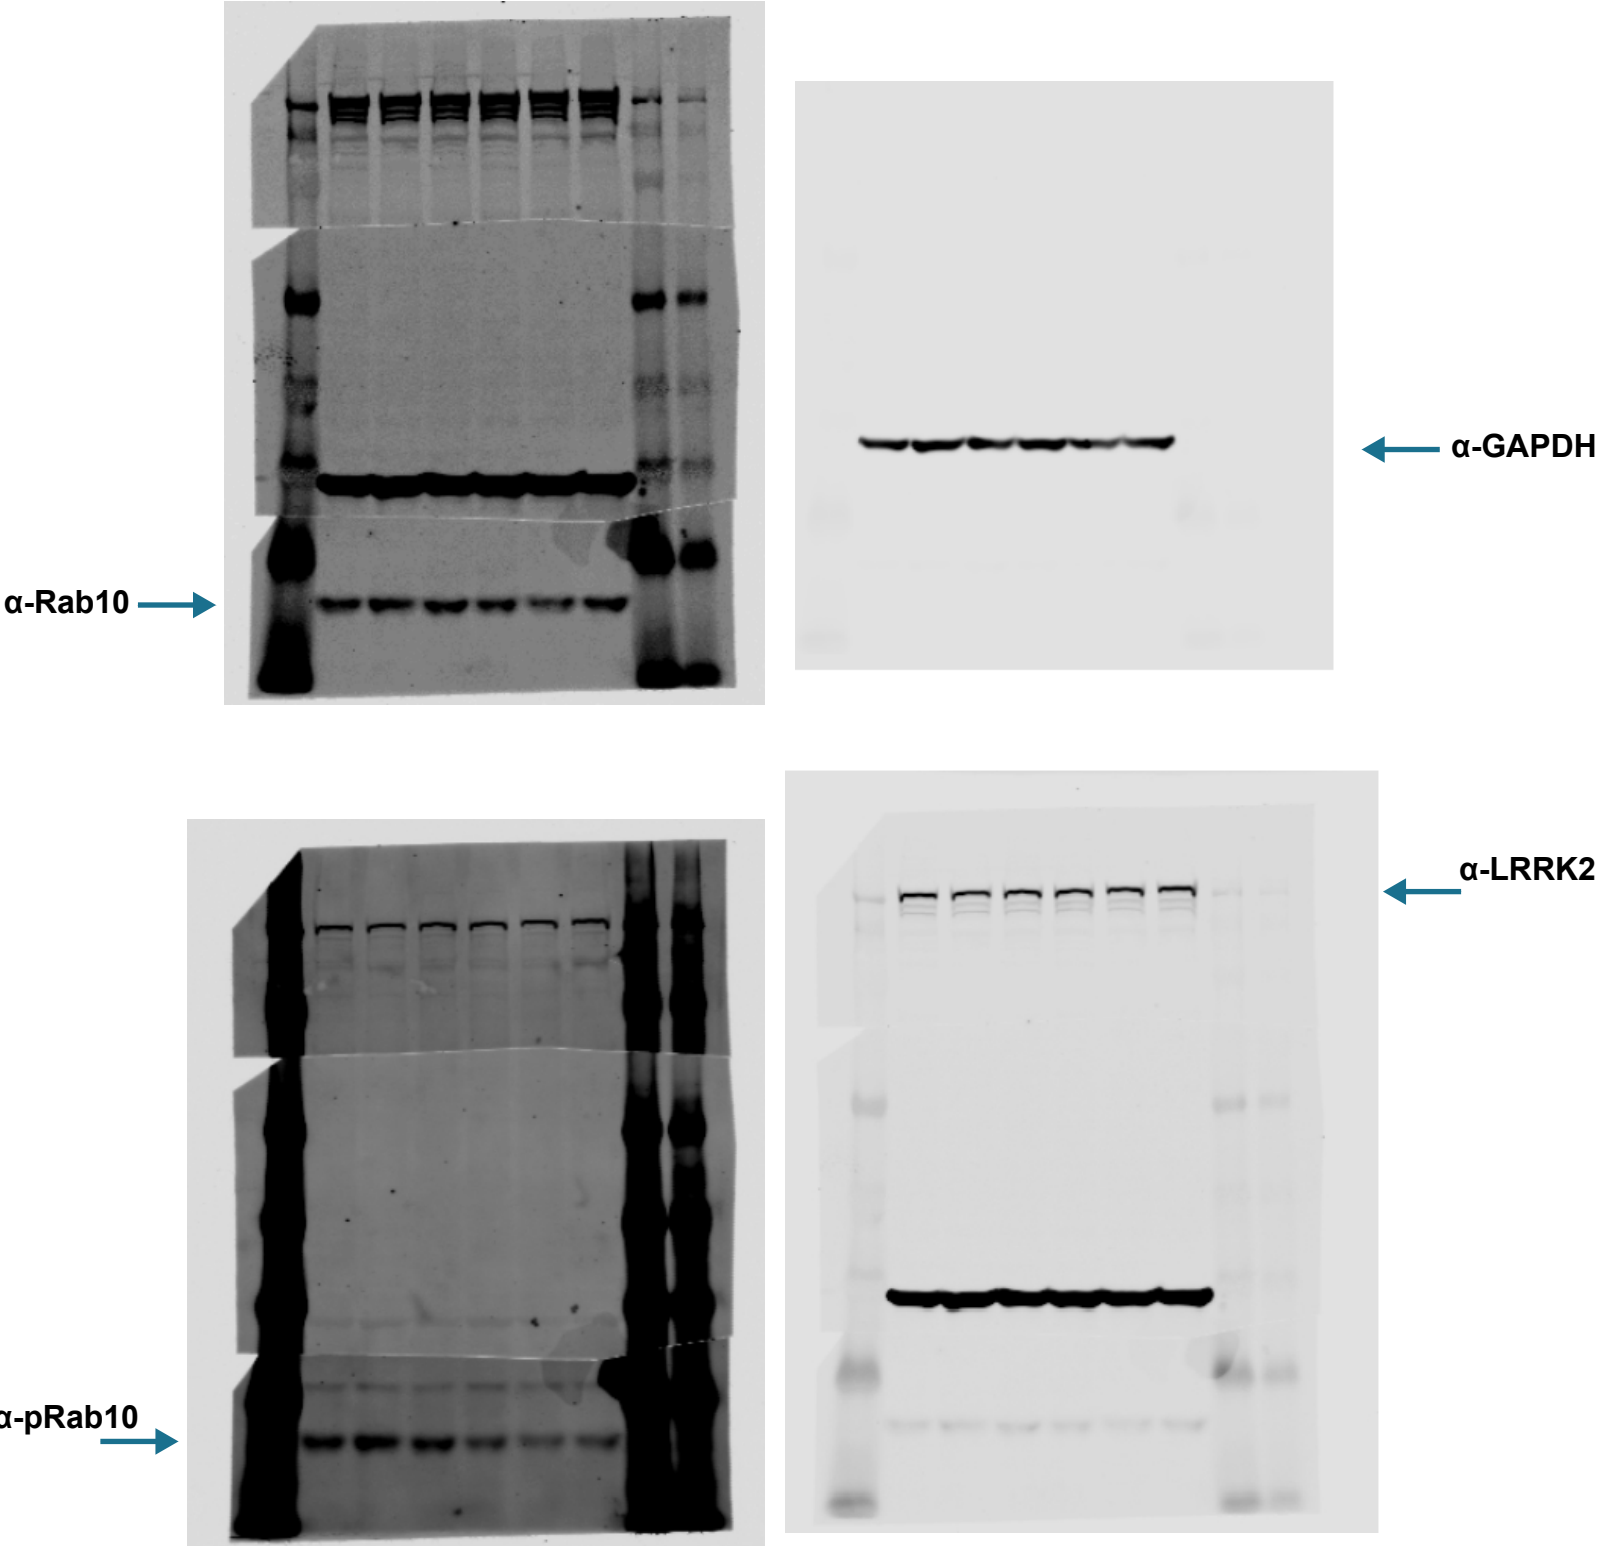

Supplement: fig1-figsupp1-data2 [file elife-87255-fig1-figsupp1-data2-v2.pdf]
