# Supplementary material for: Rab12 is a regulator of LRRK2 and its activation by damaged lysosomes
Source: eLife journal article supplement (doi:10.7554/elife.87255), 2023-10-24

Figure 2A and C

$\alpha$ -Rab12 →

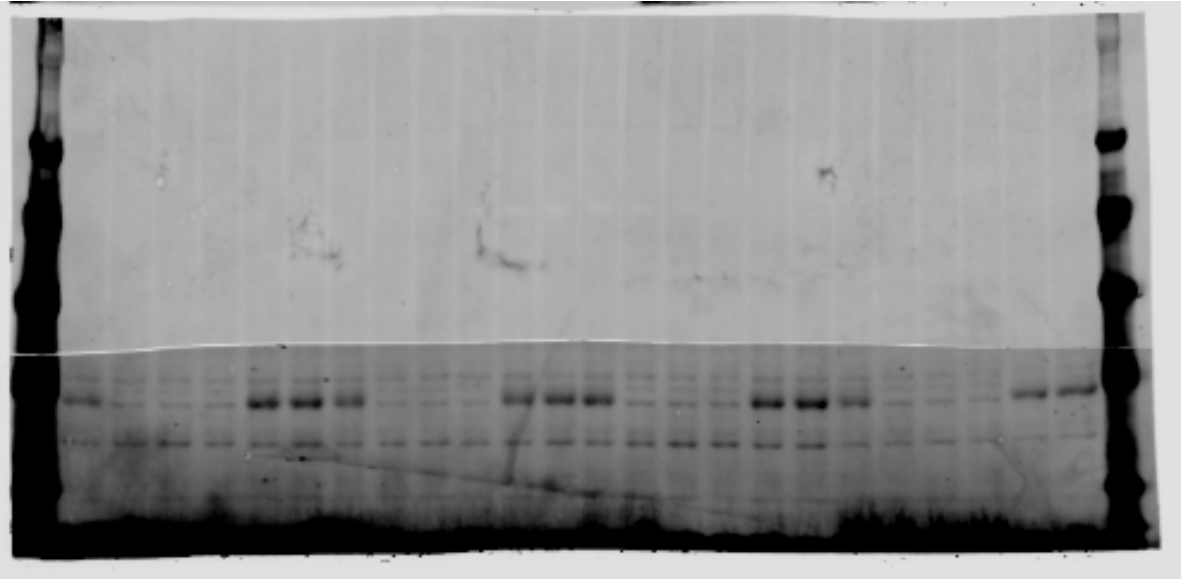

$\alpha$ -pRab12 →

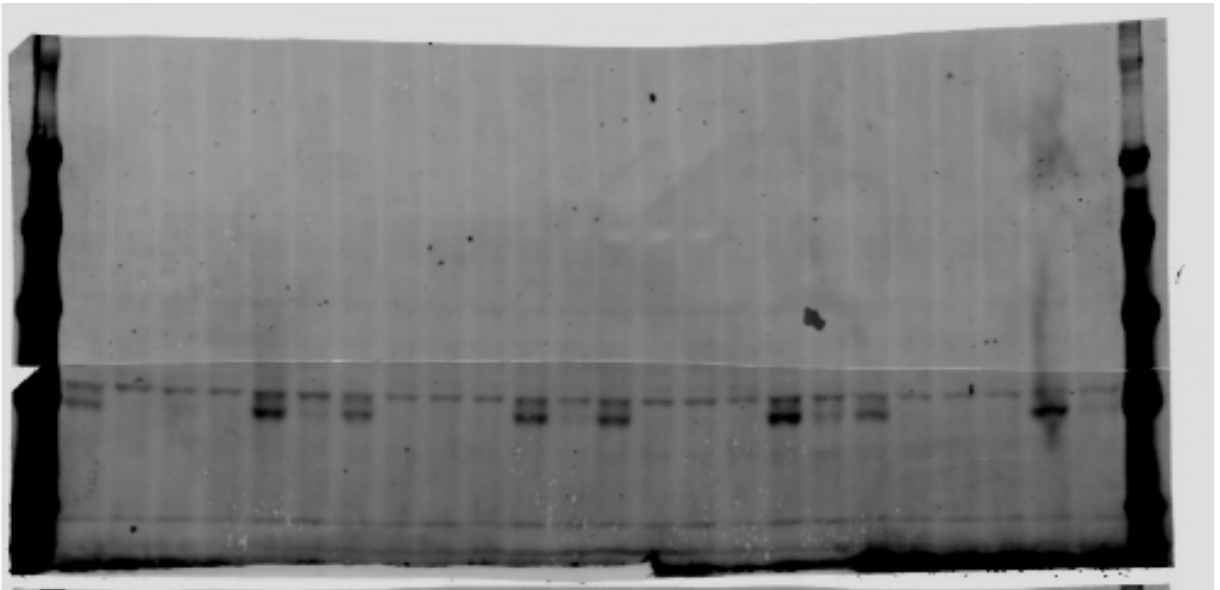

$\alpha$ -pRab10 →

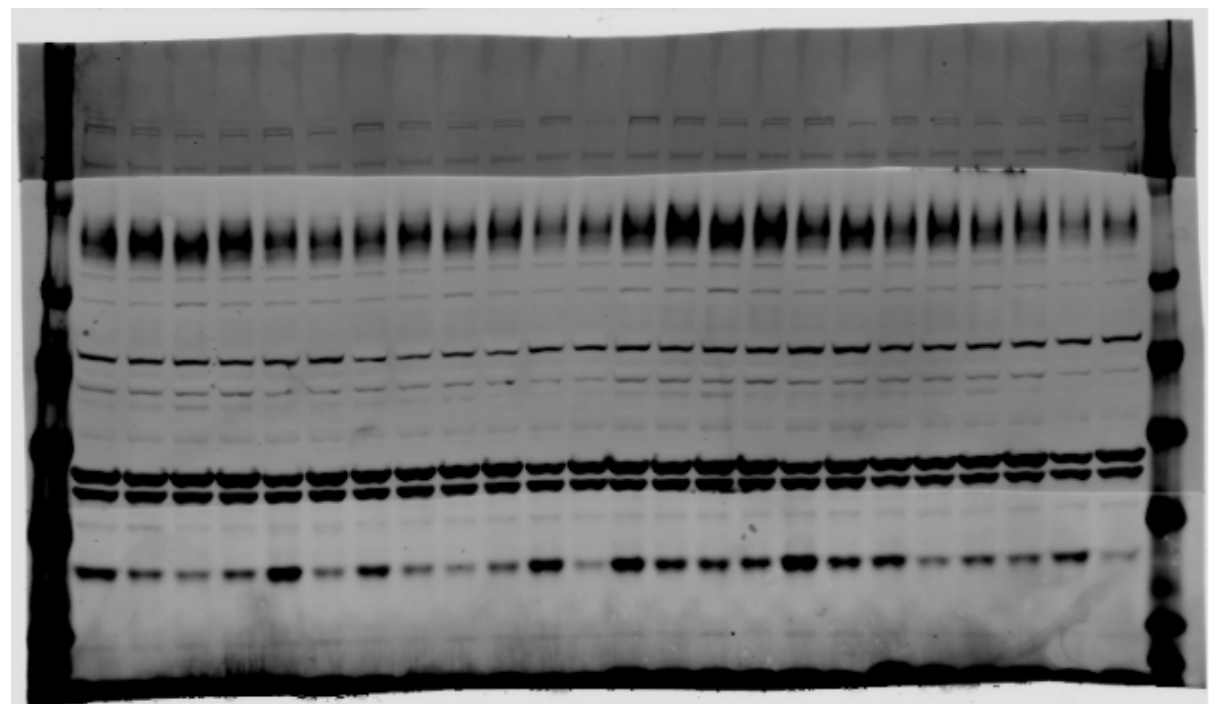

Figure 2A and C

$\alpha$ -Rab10 →

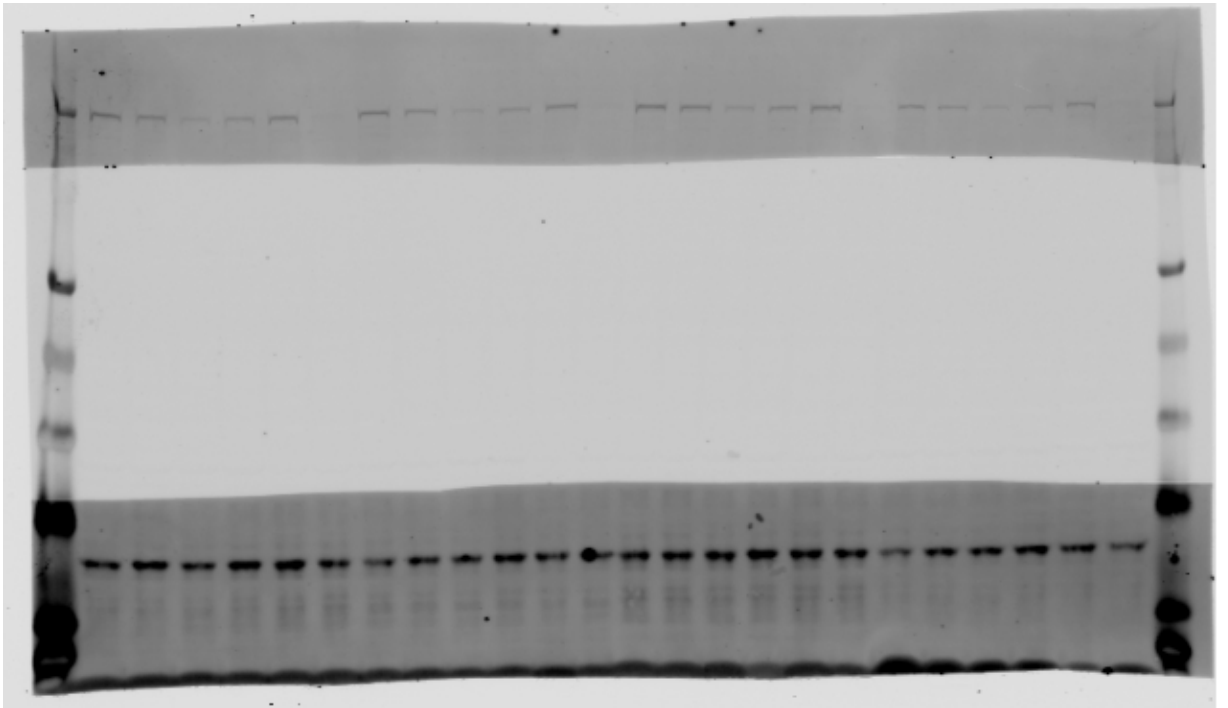

$\alpha$ -GAPDH →

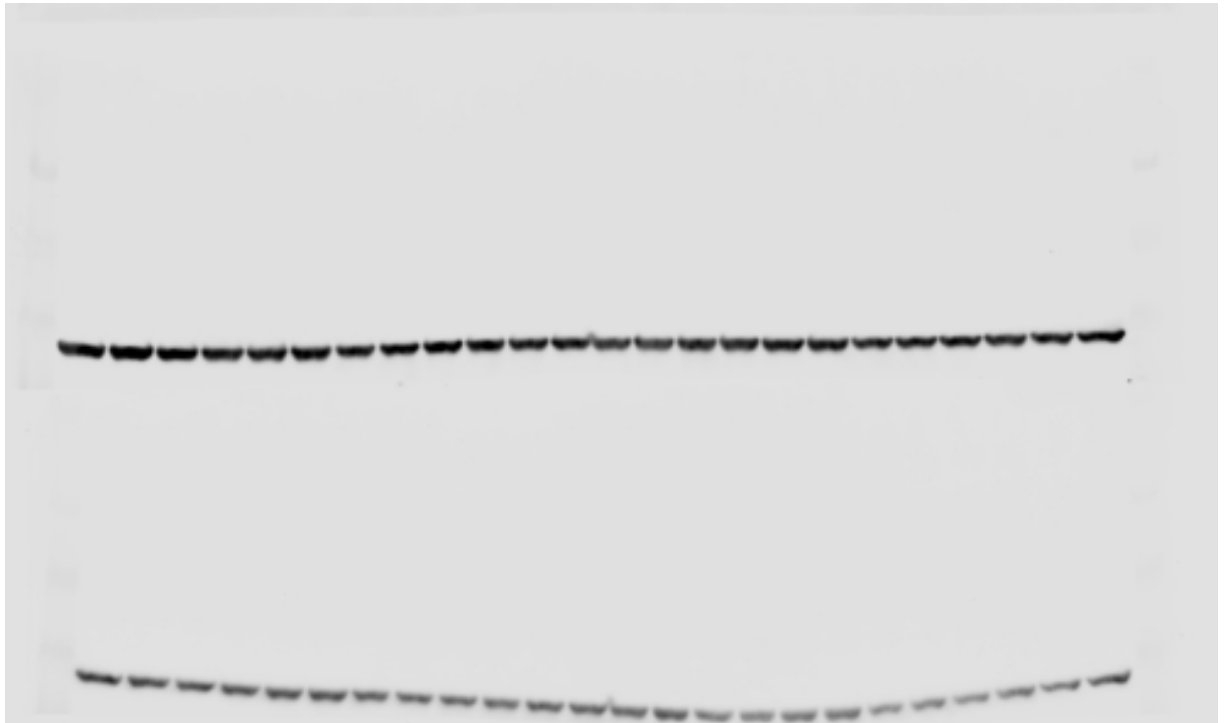

Figure 2D

$\alpha$ -Rab12 →

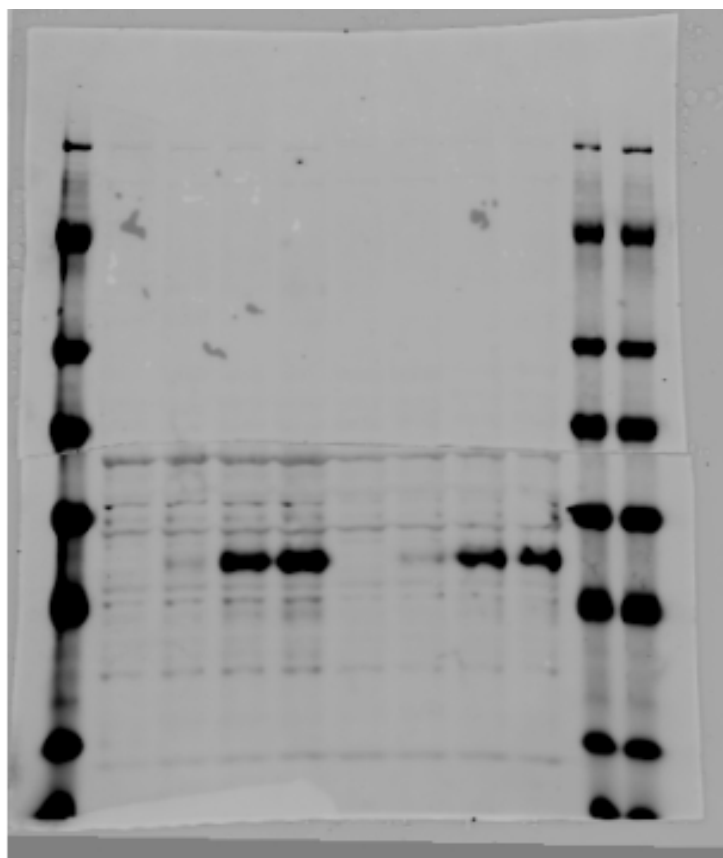

$\alpha$ -pRab12 →

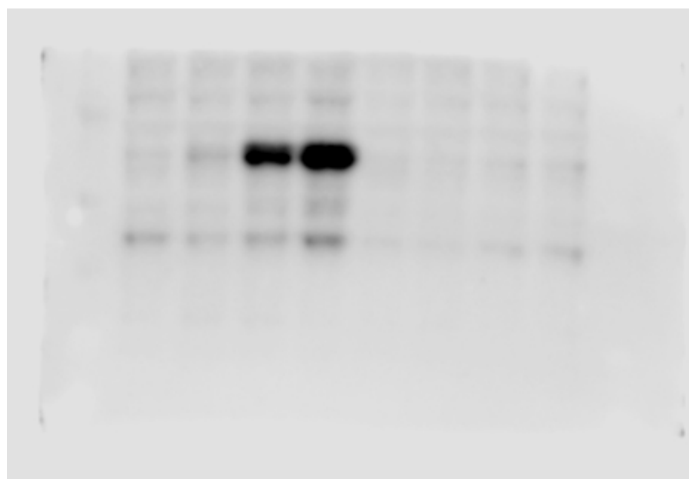

$\alpha$ -GAPDH →

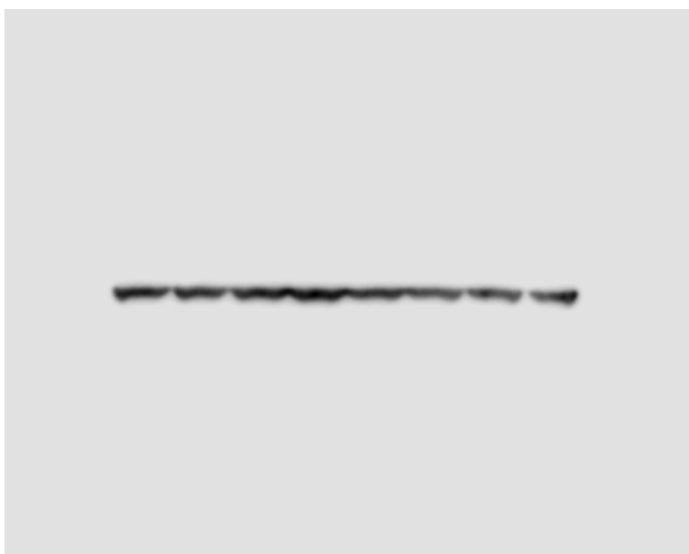

Supplement: fig2-data2 [file elife-87255-fig2-data2-v2.pdf]
