# Supplementary material for: Rab12 is a regulator of LRRK2 and its activation by damaged lysosomes
Source: eLife journal article supplement (doi:10.7554/elife.87255), 2023-10-24

## SI Figure 2A

Blots also correspond to representative blot shown in Figure 2A

$\alpha$ -Rab12 →

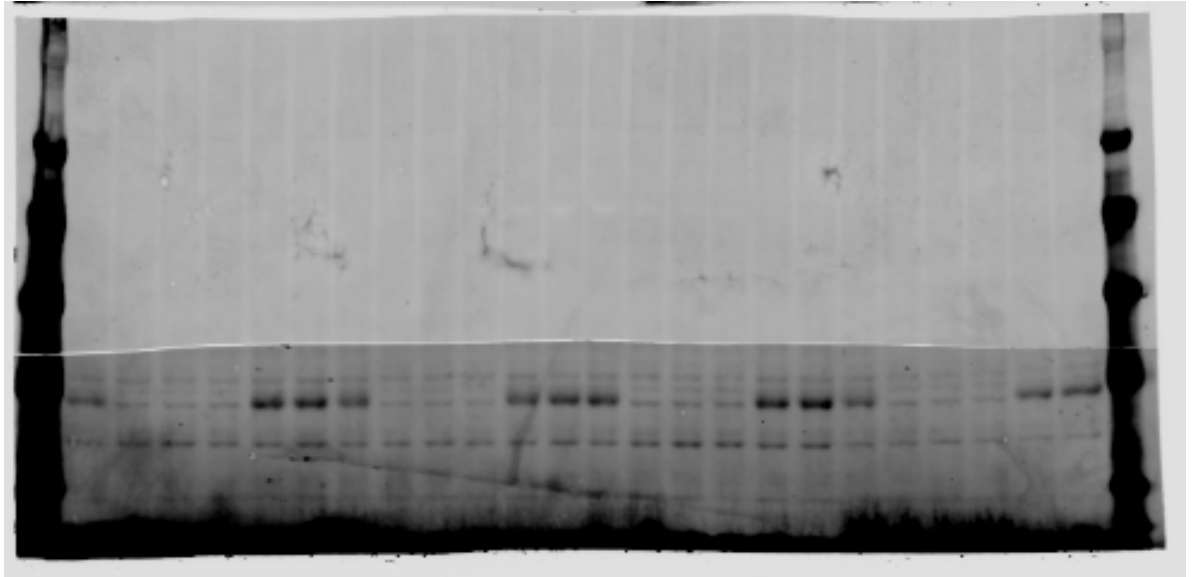

$\alpha$ -GAPDH →

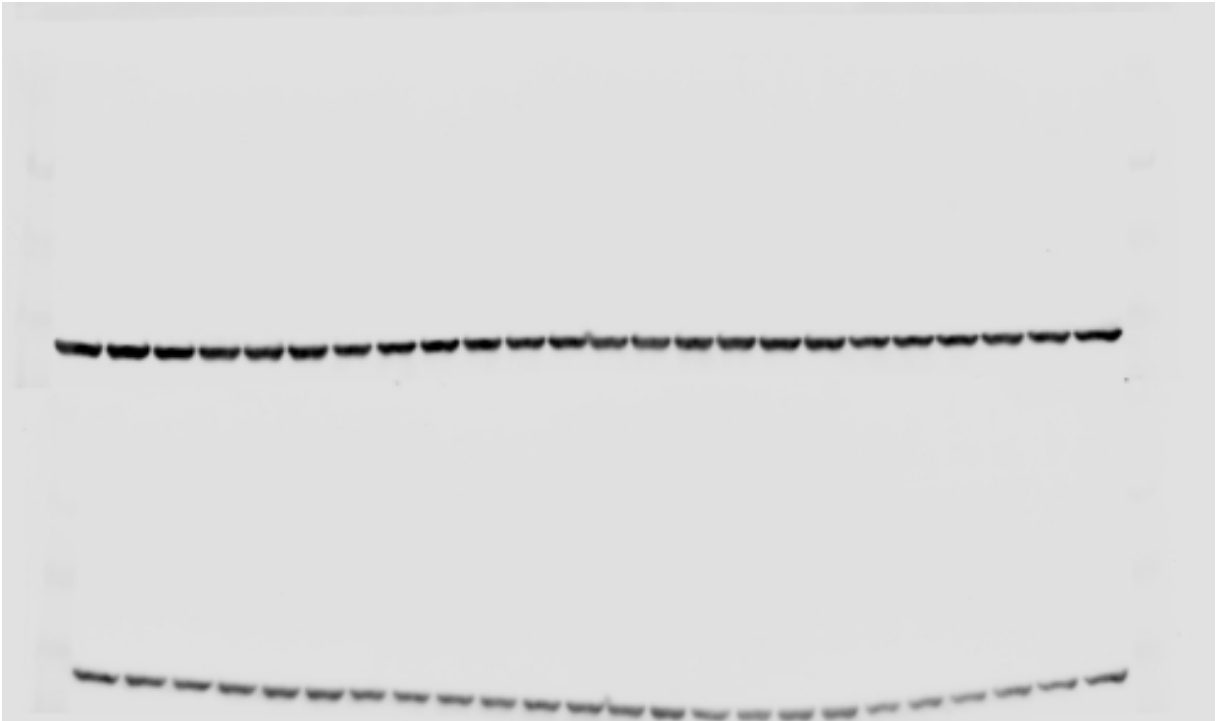

SI Figure 2B-E

$\alpha$ -pRab12 →

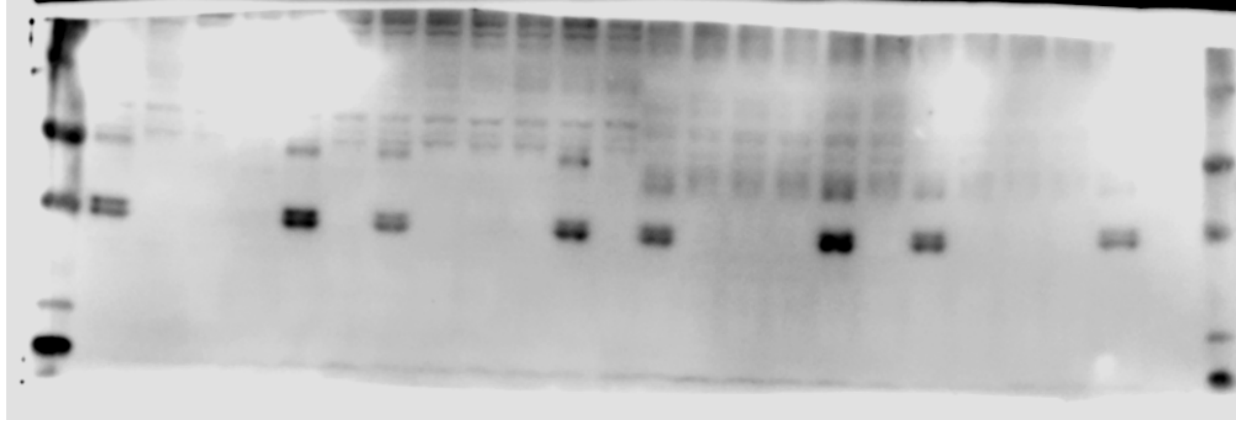

$\alpha$ -Rab12 →

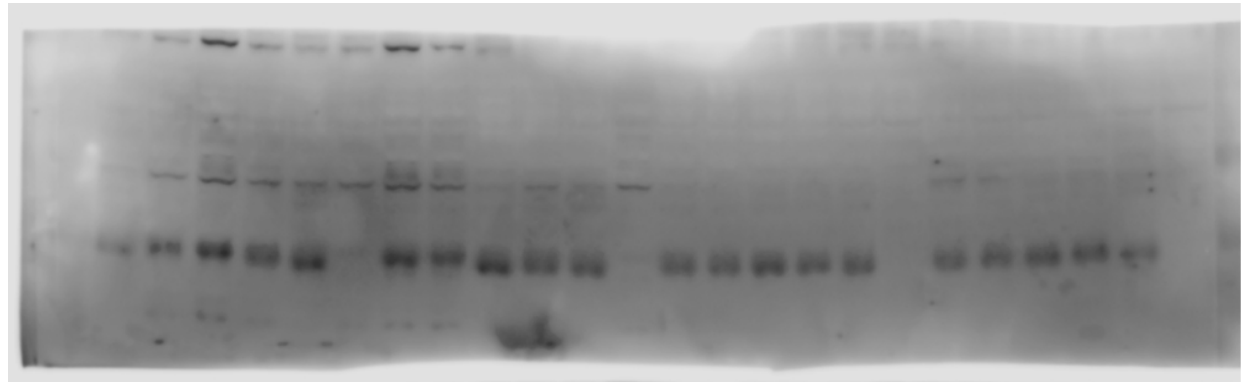

$\alpha$ -pRab10 →

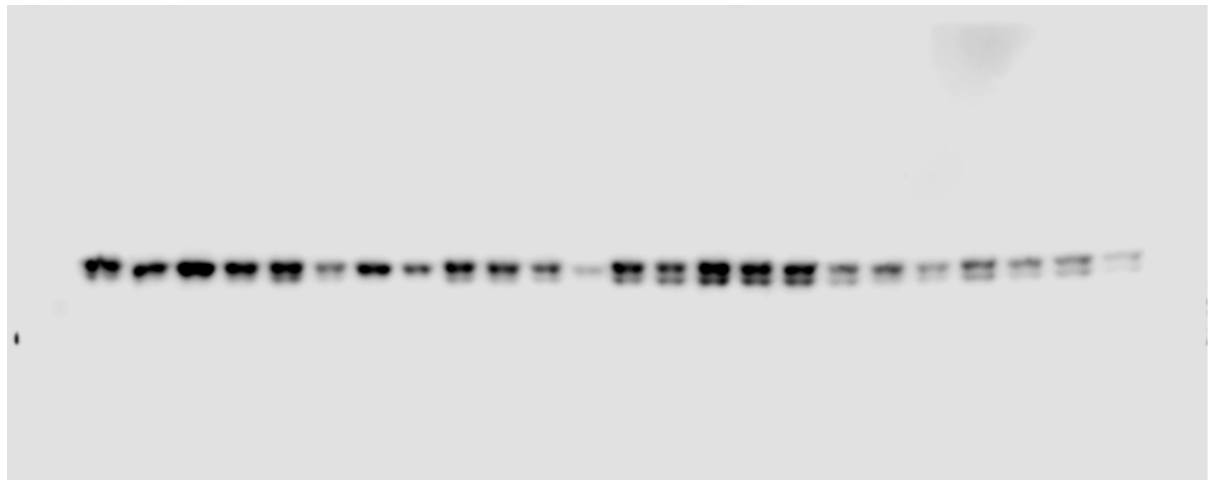

$\alpha$ -Rab10 →

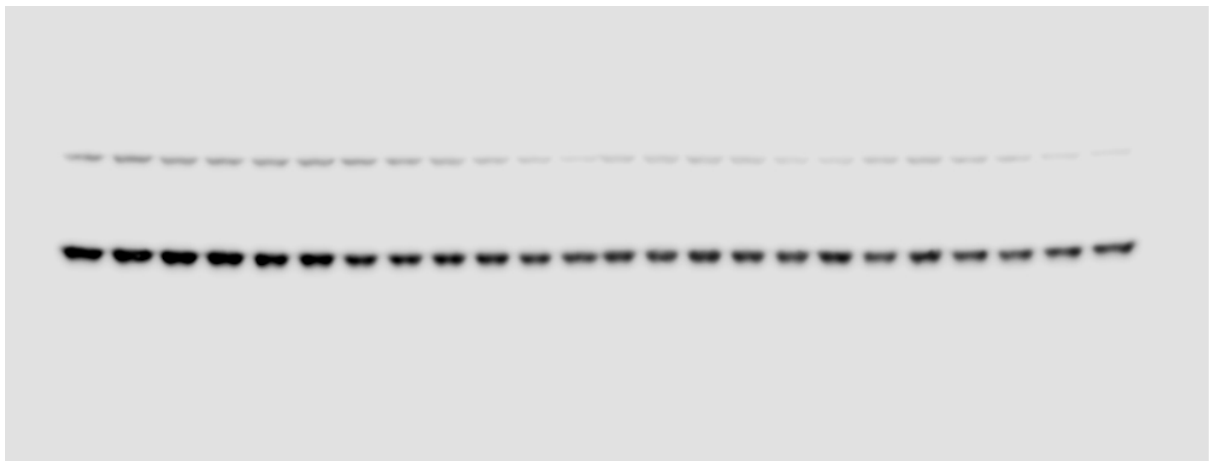

SI Figure 2B-E

$\alpha$ -GAPDH →

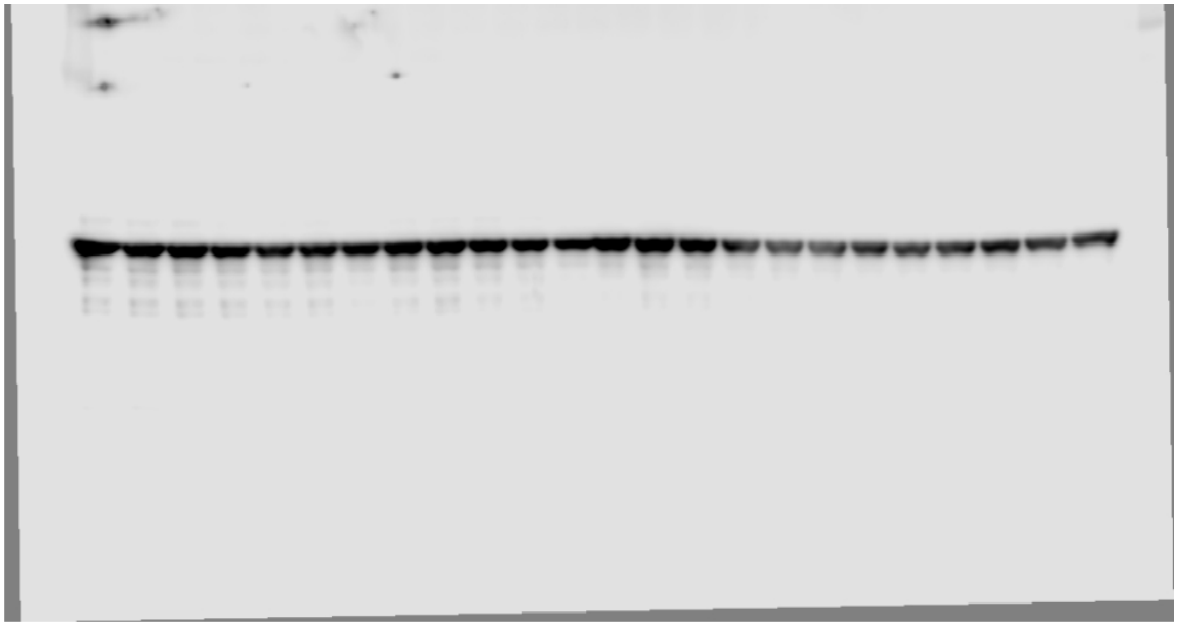

Supplement: fig2-figsupp1-data2 [file elife-87255-fig2-figsupp1-data2-v2.pdf]
