# Supplementary material for: Rab12 is a regulator of LRRK2 and its activation by damaged lysosomes
Source: eLife journal article supplement (doi:10.7554/elife.87255), 2023-10-24
Supplement: fig3-data2 [file elife-87255-fig3-data2-v2.pdf]

Figure 3A+3B

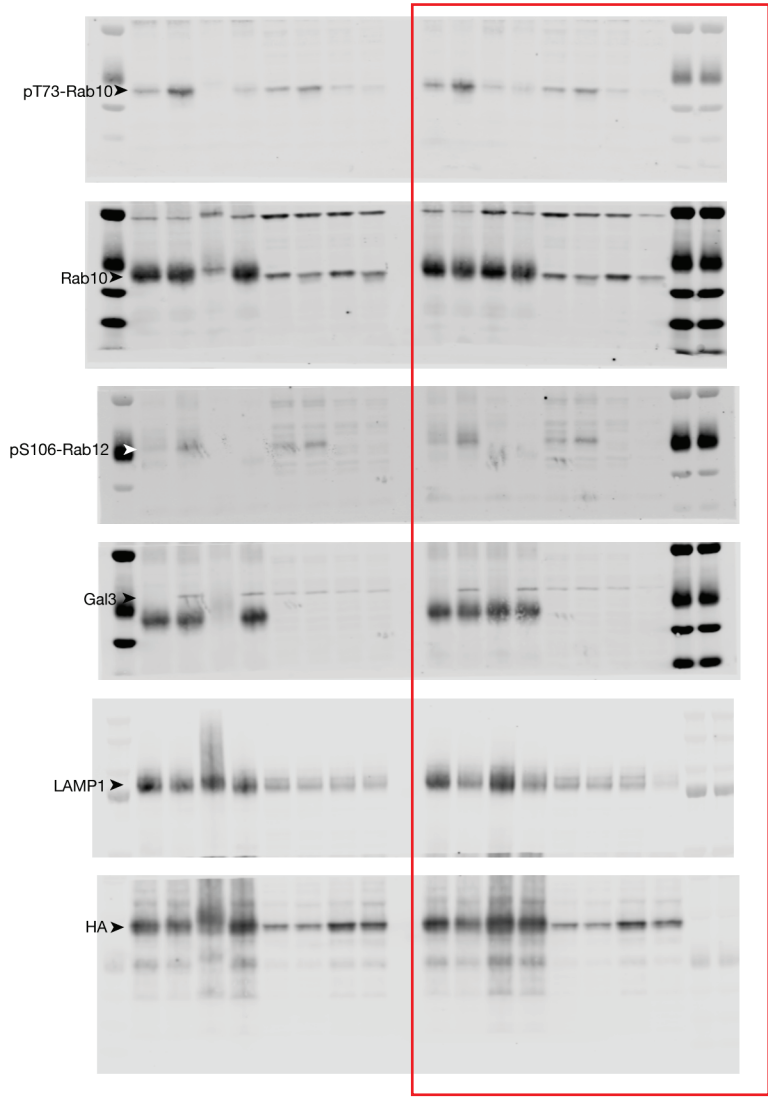

3A example blot replicate

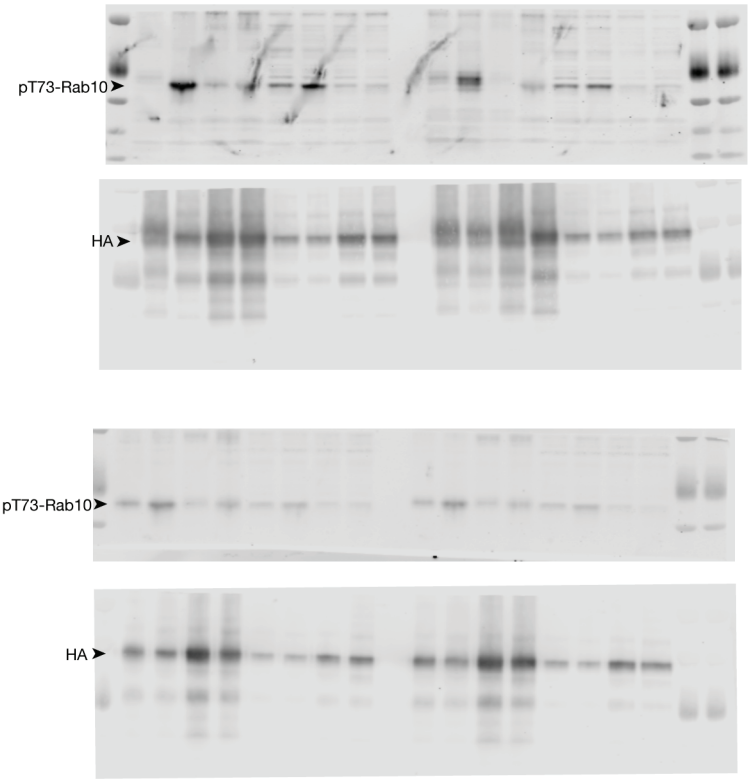

Figure 3D

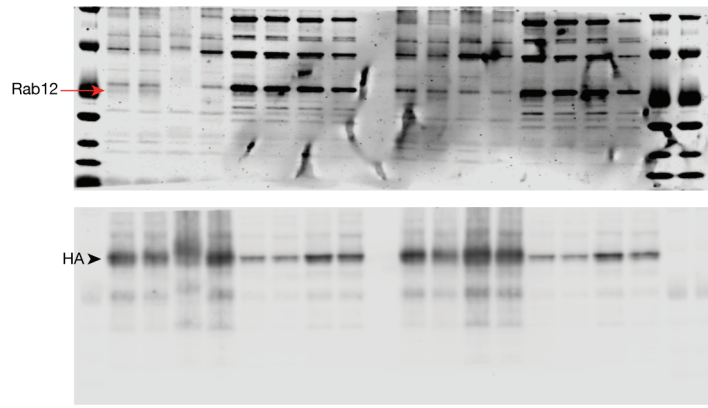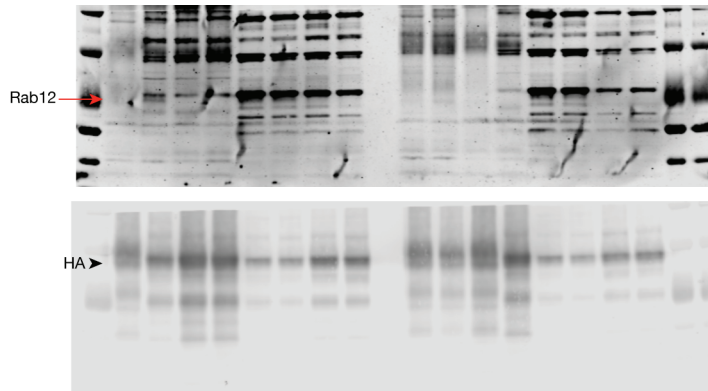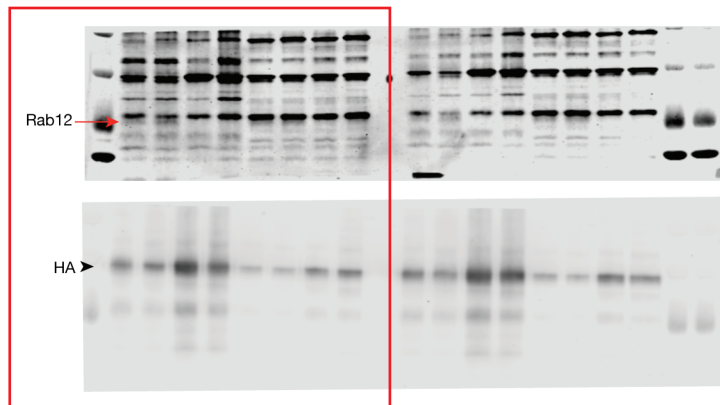

3D example blot replicate
