# Supplementary material for: Rab12 is a regulator of LRRK2 and its activation by damaged lysosomes
Source: eLife journal article supplement (doi:10.7554/elife.87255), 2023-10-24
Supplement: fig3-figsupp1-data2 [file elife-87255-fig3-figsupp1-data2-v2.pdf]

Figure S3B

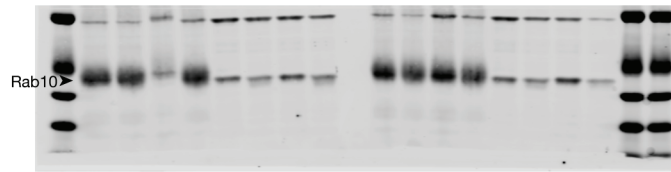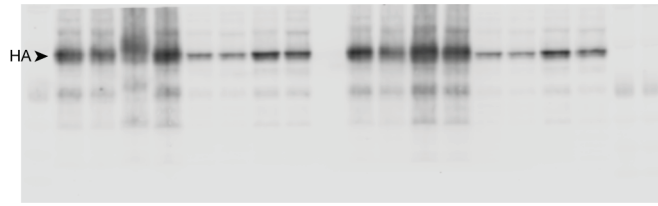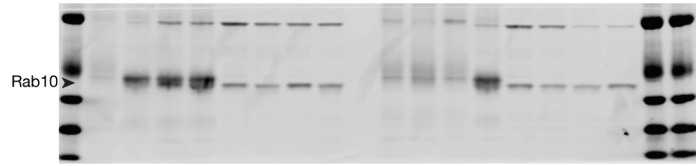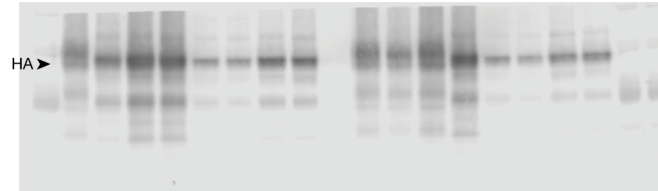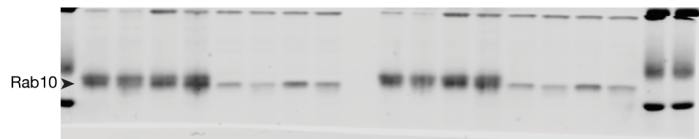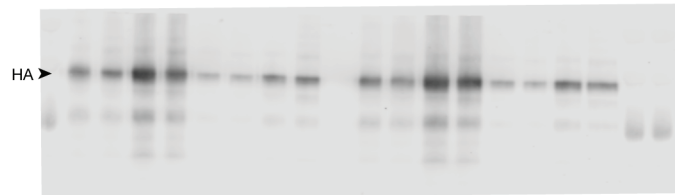

Supplementary Figure 3E

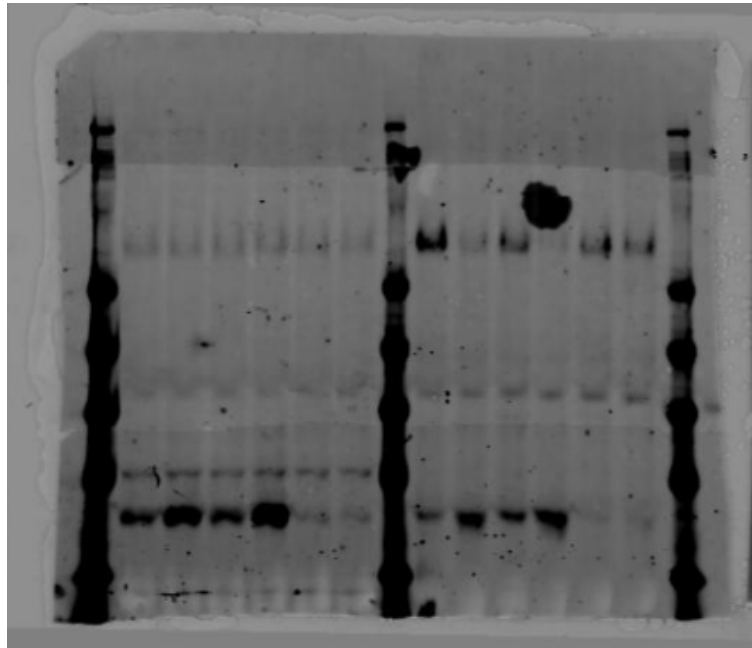

$\leftarrow$   $\alpha$ -LAMP1

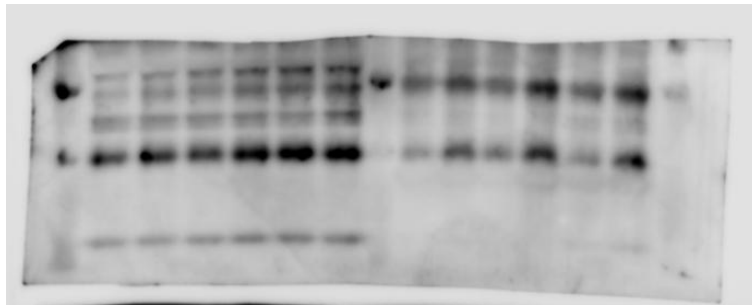

$\leftarrow$   $\alpha$ -Rab12

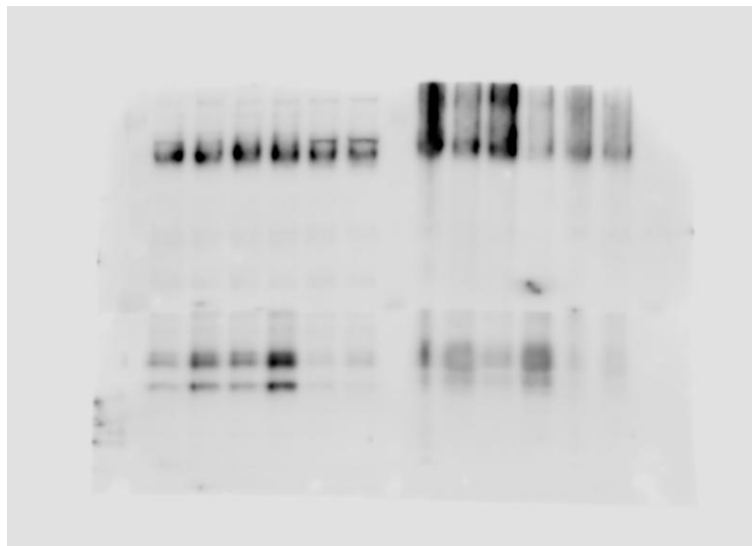

$\leftarrow$   $\alpha$ -LAMP1

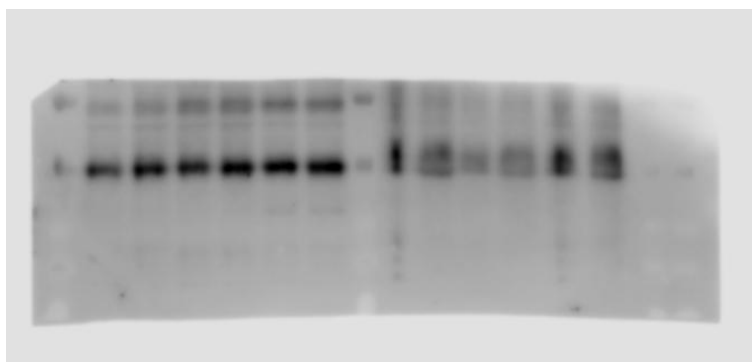

$\leftarrow$   $\alpha$ -Rab12

Supplementary Figure 3E

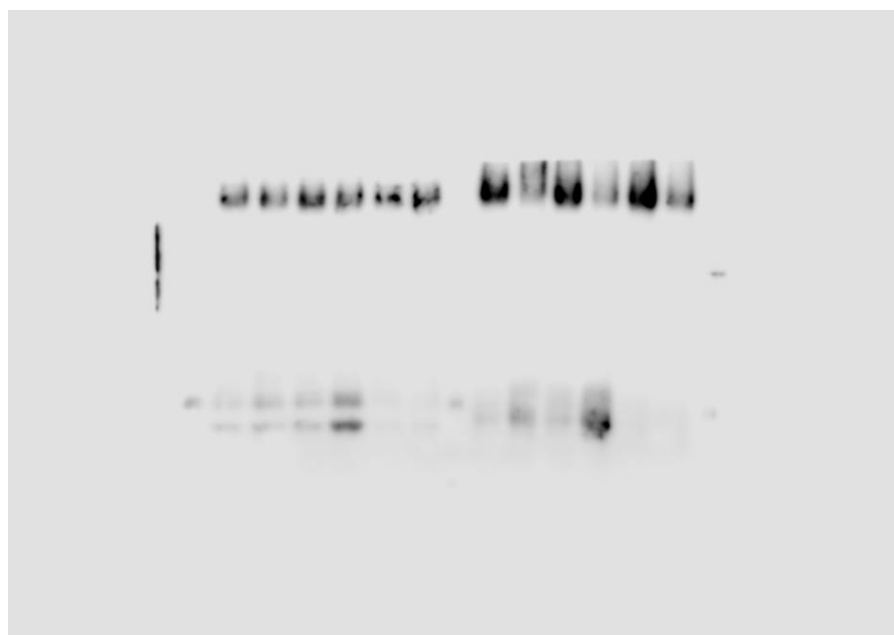

$\alpha$ -LAMP1

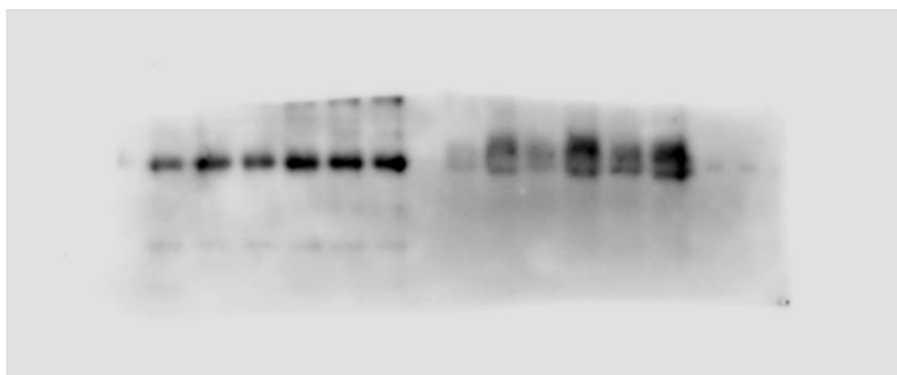

$\alpha$ -Rab12
